# Supplementary material for: Ecological and social pressures drive same-sex sexual behaviour in non-human primates
Source: Springer Nature journal article supplement (doi:10.1038/s41559-025-02945-8), 2026-01-12
Supplement: 41559_2025_2945_MOESM1_ESM.pdf [file 41559_2025_2945_MOESM1_ESM.pdf]

# **Ecological and social pressures drive same-sex sexual behaviour in non-human primates**

---

In the format provided by the  
authors and unedited

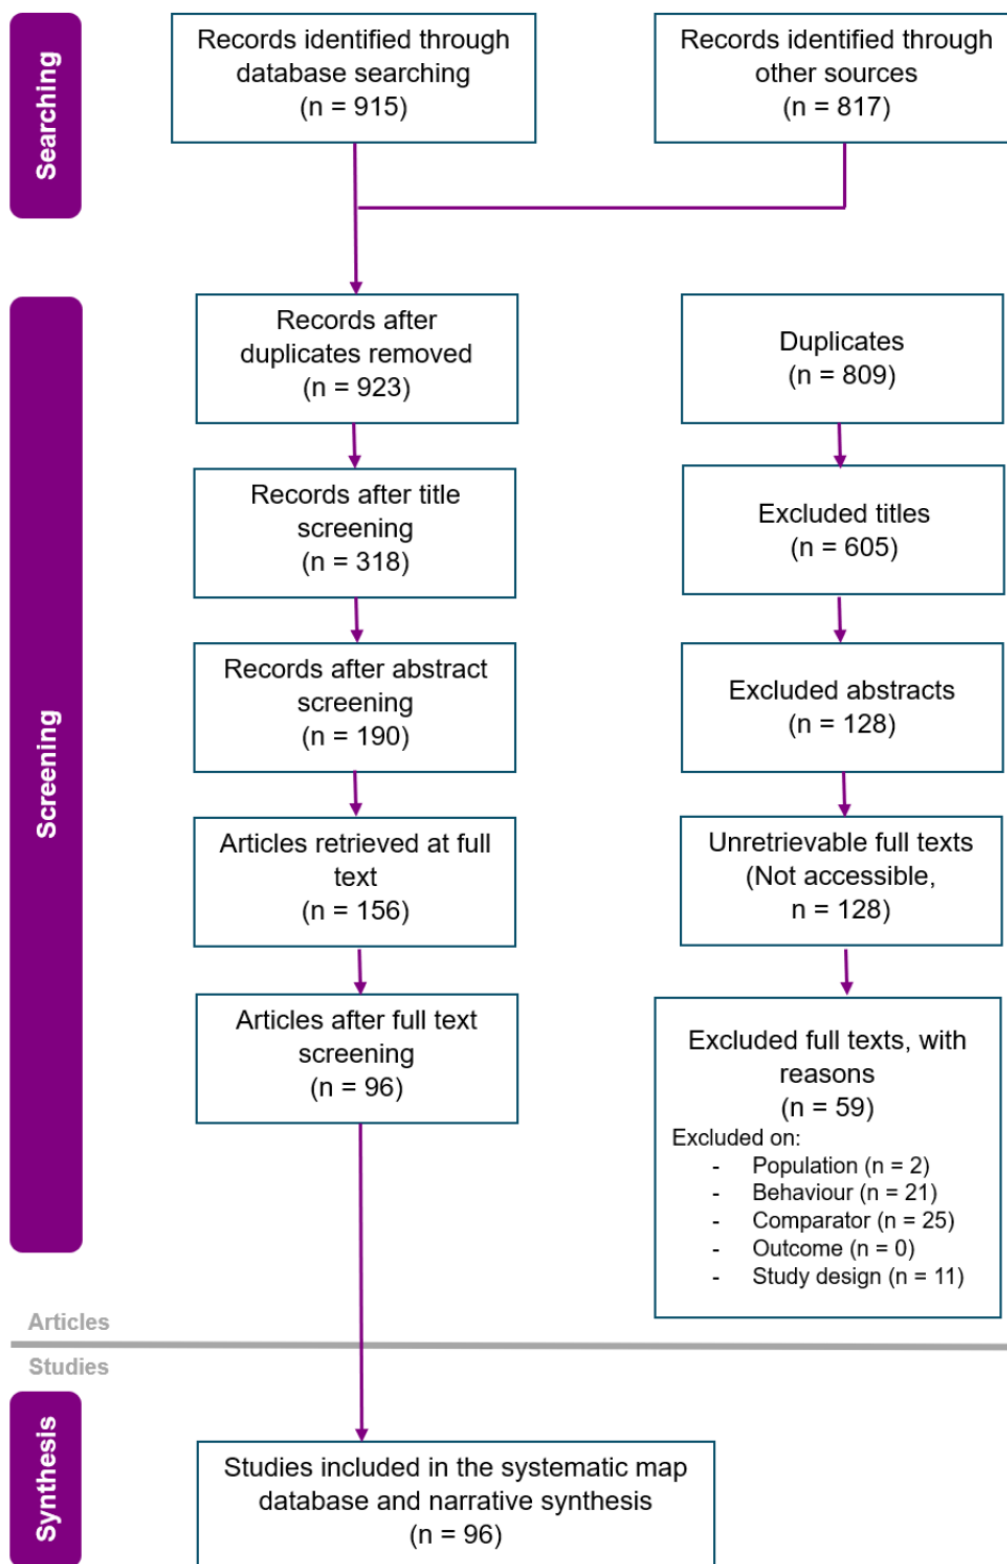

**Supplementary Figure 1** – ROSES chart depicting the screening process of the systematic search conducted using a PICOS framework.
