# Supplementary material for: Ecological and social pressures drive same-sex sexual behaviour in non-human primates
Source: Springer Nature journal article supplement (doi:10.1038/s41559-025-02945-8), 2026-01-12
Supplement: 41559_2025_2945_MOESM3_ESM.xlsx [file 41559_2025_2945_MOESM3_ESM.xlsx]

## Sheet: Supplementary Table 1
Supplementary Table 1 – Species SSB Details – List of current primate species with documented SSB, along with recorded details, including: number of records, number of instances of SSB, sampling effort (hours), SSB prevalence (instances/sampling effort), sex of SSB, SSB position in hierarchy, environment of SSB, and dates of SSB.
species_name	common_name	number_of_records	instances_of_ssb	ssb_ethogram	sampling_hours	ssb_prevalence	sex_of_ssb	ssb_position_in_hierarchy	environment_of_ssb	ssb_dates	records
Ateles_fusciceps	Black-headed spider monkey	1	1	0	149	0.00671141	1 male	NA	Wild	March-August	Gottstein et al., 2024
Ateles_geoffroyi	Geoffroy's spider monkey	1	3	1	1800	0.00166667	3 male	NA	NA	NA	Busia et al., 2018
Callithrix_jacchus	Common marmoset	2	5	1	1729	0.00289184	1 male, 1 female, 3 NA	Low	Captive and wild	NA	Lazaro-Perea, 2001; Bagemihl, 1999
Callithrix_penicillata	Black-tufted marmoset	2	2	1	40	0.05	NA	NA	NA	NA	Agmo et al., 2018; Bagemihl, 1999
Cebus_albifrons	White-fronted capuchin	1	2	0	NA	NA	1 male, 1 female	NA	NA	NA	Bagemihl, 1999
Cebus_capucinus	Colombian white-faced capuchin	2	17	0	1333	0.0127532	10 male, 6 female, 1 NA	NA	NA	NA	Manson et al., 1997; Bagemihl, 1999
Cebus_imitator	Panamaniam white-faced capuchin	1	2	0	NA	NA	1 male, 1 female	NA	NA	NA	Bagemihl, 1999
Cebus_olivaceus	Wedge-capped capuchin	1	2	0	NA	NA	1 male, 1 female	NA	NA	NA	Bagemihl, 1999
Cercocebus_atys	Sooty mangabey	1	2	0	NA	NA	1 male, 1 female	NA	Captive and wild	NA	Bagemihl, 1999
Cercopithecus_ascanius	Red-tailed monkey	1	2	0	NA	NA	1 male, 1 female	NA	Captive and wild	NA	Bagemihl, 1999
Cercopithecus_mona	Mona monkey	1	1	0	NA	NA	1 NA	NA	NA	NA	Bagemihl, 1999
Chlorocebus_pygerythrus	Vervet monkey	1	2	0	NA	NA	1 male, 1 female	NA	NA	NA	Bagemihl, 1999
Colobus_guereza	Mantled guereza	1	55	0	86	0.639535	5 male, 50 female	Low-Med	Captive	December-February, April-October	Bagemihl, 1999
Colobus_vellerosus	Ursine colobus	1	13	0	1600	0.008125	11 male, 2 female	Low-Med	Semi-wild	Year-round	Teichroeb et al., 2023
Erythrocebus_patas	Common patas monkey	1	2	0	NA	NA	1 male, 1 female	NA	Captive and wild	NA	Bagemihl, 1999
Galago_moholi	Mohol bushbaby	1	2	0	NA	NA	1 male, 1 female	NA	Captive and wild	NA	Bagemihl, 1999
Gorilla_beringei	Mountain gorilla	5	308	0	7135	0.0431675	264 male, 44 female	Low-High	Wild	Year-round	Grueter & Stoinski, 2016; Yamagiwa, 1987; Yamagiwa, 1992; Yamagiwa, 2006: Robbins, 1996
Gorilla_gorilla	Lowland gorilla	3	14	0	364	0.0384615	2 male, 12 female	Low-High	Captive, semi-wild, wild	NA	Stoinski et al., 2001; Fischer & Nadler, 1978; Bagemihl, 1999
Hylobates_lar	Lar gibbon	2	56	0	750	0.0746667	56 male	NA	Captive, semi-wild, wild	December-January	Edwards & Todd, 1991; Bagemihl 1999
Lagothrix_lagotricha	Common woolly monkey	1	1	0	NA	NA	NA	NA	NA	NA	Bagemihl, 1999
Lagothrix_poeppigii	Silvery woolly monkey	1	1	0	NA	NA	NA	NA	NA	NA	Di Fiore & Fleischer, 2005; Bagemihl 1999
Leontopithecus_rosalia	Golden lion tamarin	1	2	0	NA	NA	1 male, 1 female	NA	Captive and wild	NA	Bagemihl, 1999
Lophocebus_albigena	Grey-cheeked mangabey	1	2	0	NA	NA	1 male, 1 female	NA	Captive and wild	NA	Bagemihl, 1999
Macaca_arctoides	Stump-tailed macaques	5	102	0	685	0.148905	27 male, 61 female, 1 NA	Low-High	Captive and semi-wild	NA	Goldfoot et al., 1980; Chevalier-Skolnikoff, 1976; Chevalier-Skolnikoff, 1974; Call et al., 2002
Macaca_fascicularis	Crab-eating macaque	3	16	0	NA	NA	6 male, 1 female, 1 NA	Low	Wild and captive	June	Thierry et al., 2008; Sabana et al., 2023; Bagemihl, 1999
Macaca_fuscata	Japanese macaque	22	16354	1	5900	2.77186	1450 male, 14906 female	Low-High	Captive, semi-wild, wild	NA	Thierry et al., 2008; Carrier et al., 2015; Wolfe, 1979; Leca et al., 2015; Leca et al., 2014; Vasey et al., 2008; Vasey et al., 2008; Vasey, 1996; Vasey et al., 2006; Chapais & Mignault, 1991; Takenoshita, 1998; Hanby, 1974; Vasey et al., 1998; O'Neil et al., 2004; Gouzoules & Goy, 1983; Vasey, 2004; Vasey, 2002; Vasey & Duckworth, 2006; Vasey & Gauthier, 2000; Vasey, 2006; Leca et al., 2015; Le…
Macaca_maura	Moor macaque	1	2	0	NA	NA	1 male, 1 female	NA	Captive and wild	NA	Bagemihl, 1999
Macaca_mulatta	Rhesus macaque	11	3807	1	2596	1.46649	1560 male, 2208 female, 39 NA	Low-High	Captive, semi-wild, wild	Year-round	Thierry et al., 2008; Erwin & Maple, 1976; de Waal & Ren, 1988; Mehlman, 1997; Reinhardt et al., 1986; Akers & Conaway, 1979; Rind, 2024; Clive et al., 2023; Gordon & Bernstein, 1973; Fairbanks et al., 1977; Wilson & Vessey, 1968
Macaca_nemestrina	Southern pig-tailed macaque	2	28	1	76	0.368421	27 male, 1 female	Low-High	Captive and wild	January-March	Thierry et al., 2008; Oi, 1990
Macaca_nigra	Celebes crested macaque	2	12	0	NA	NA	1 male, 1 female, 10 NA	NA	Captive and wild	NA	Thierry et al., 2008; Bagemihl, 1999
Macaca_radiata	Bonnet macaque	1	2	0	NA	NA	1 male, 1 female	NA	Captive and wild	NA	Bagemihl, 1999
Macaca_silenus	Lion-tailed macaque	1	2	0	NA	NA	1 male, 1 female	NA	Captive and wild	NA	Thierry et al., 2008
Macaca_sylvanus	Barbary macaque	1	235	0	1372	0.171283	235 male	Low-High	Semi-wild	June-October	Faraut et al., 2015
Macaca_thibetana	Tibetan macaque	1	40	1	1200	0.0333333	40 male	Low-High	Wild	Year-round	Berman et al., 2006
Macaca_tonkeana	Tonkean macaque	1	59	0	367	0.160763	29 male, 30 female	NA	Wild	Year-round	Thierry et al., 2008
Miopithecus_talapoin	Angolan talapoin	1	2	0	NA	NA	1 male, 1 female	NA	NA	NA	Bagemihl, 1999
Nasalis_larvatus	Proboscis monkey	2	3	0	676	0.00443787	1 male, 2 female	NA	Captive and wild	NA	Yeager, 1990; Bagemihl, 1999
Pan_paniscus	Bonobo	17	4334	1	8394	0.516321	680 male, 3654 female	Low-High	Captive and wild	Year-round	Hashimoto, 1997; Kitamura, 1989; Annicchiarico et al., 2020; Palagi et al., 2020; Manson et al., 1997; Yokoyama & Furuichi, 2023; Paoli et al., 2006;, Thompson-Handler et al., 1984; Fruth & Hohmann, 2006; Idani, 1991; Savage-Rumbaugh & Walkers, 1978; de Waal, 1990; Moscovice et al., 2019; Hohmann et al., 2009; Hohmann & Fruth, 2000; Moscovice et al., 2017; Bagemihl, 1999
Pan_troglodytes	Chimpanzee	5	600	1	2361	0.25413	194 male, 406 female	Low-High	Captive, semi-wild, wild	Year-round	Brooker et al., 2021; Anestis, 2004; Thompson-Handler et al., 1984; Savage-Rumbaugh, 1978; Sandel & Reddy, 2021
Papio_anubis	Olive baboon	2	56	0	100	0.56	55 male, 1 female	Med-High	Wild	May-August	Smuts & Watanabe, 1990; Bagemihl, 1999
Papio_cynocephalus	Yellow baboon	2	184	1	603	0.305141	104 male, 80 female	Med-High	Wild	May-December	Hausfater, 1987; Bagemihl, 1999
Papio_hamadryas	Hamadryas baboon	1	2	0	NA	NA	1 male, 1 female	NA	Captive and wild	NA	Bagemihl, 1999
Pongo_abelii	Sumatran orangutan	1	2	1	NA	NA	2 male	NA	Wild	Year-round	Fox, 2001
Pongo_pygmaeus	Bornean orangutan	1	2	0	NA	NA	1 male, 1 female	NA	Captive, semi-wild	NA	Bagemihl, 1999
Propithecus_verreauxi	Verreaux's sifaka	1	2	0	NA	NA	1 male, 1 female	NA	Captive and wild	NA	Bagemihl, 1999
Rhinopithecus_roxellana	Golden snub-nosed monkey	4	3558	1	1771	2.00903	3557 male, 1 female	Low-High	Captive and wild	Year-round	Huang et al., 2017; Huang et al., 2023; Fang et al., 2018; Bagemihl, 1999
Saguinus_fuscicollis	Brown-mantled tamarin	1	2	0	NA	NA	1 male, 1 female	NA	Captive	NA	Bagemihl, 1999
Saguinus_geoffroyi	Geoffroy's tamarin	1	2	0	NA	NA	1 male, 1 female	NA	Captive, semi-wild	NA	Bagemihl, 1999
Saguinus_mystax	Moustached tamarin	1	2	0	NA	NA	1 male, 1 female	NA	Captive and wild	NA	Bagemihl, 1999
Saguinus_oedipus	Cotton-top tamarin	1	2	0	NA	NA	1 male, 1 female	NA	Captive and wild	NA	Bagemihl, 1999
Saimiri_sciureus	Common squirrel monkey	2	31	0	14	2.21429	1 male, 30 female	Med-High	Captive, semi-wild	February	Talmage-Riggs & Anschel, 1973; Bagemihl, 1999
Sapajus_apella	Tufted capuchin	1	2	0	NA	NA	1 male, 1 female	NA	Captive and wild	NA	Bagemihl, 1999
Sapajus_libidinosus	Black-striped capuchin	1	1	0	NA	NA	1 male	High	Wild	NA	Rufo & Ottoni, 2021
Sapajus_nigritus	Black capuchin	2	21	1	2496	0.00841346	20 male, 1 female	High	Wild	September-August	Rufo & Ottoni, 2021; Franca et al., 2023
Sapajus_xanthosternos	Golden-bellied capuchin	1	1	1	NA	NA	1 male	Low	Wild	March-April	Delval et al., 2023
Semnopithecus_entellus	Northern plains gray langur	3	1142	0	3233	0.353232	159 male, 983 female	Low-High	Captive and wild	Year-round	Sommer et al., 2006; Sommer, 1988; Bagemihl, 1999
Symphalangus_syndactylus	Siamang	1	1	0	NA	NA	1 male	NA	Captive and wild	NA	Bagemihl, 1999
Theropithecus_gelada	Gelada	1	2	0	NA	NA	1 male, 1 female	NA	Captive and wild	NA	Bagemihl, 1999
Trachypithecus_johnii	Nilgiri langur	1	2	0	NA	NA	1 male, 1 female	NA	Captive and wild	NA	Bagemihl, 1999

## Sheet: Supplementary Table 2
Supplementary Table 2 – Environment Occurrence – Results from a phylogenetic logistic regression (phyloglm) testing the effect of environmental predictors on the occurrence of same-sex sexual behaviour (SSB) across primates. The model includes five predictors: mean annual temperature, mean annual precipitation, mean cloud cover, resource availability, and predation pressure.
Predictor Variable	Estimate ± SE (p-value)	Log likelihood	AIC	Alpha
Intercept	β0: -0.867 ± 0.455 (0.057)	-164.6	343.2	3.267
Temperature	Temperature: 0.03 ± 0.041 (0.455)
Precipitation	Precipitation: -0.341 ± 0.111 (0.002)
Cloud Cover	Cloud cover: 0.01 ± 0.105 (0.921)
Biomass	Biomass: -0.177 ± 0.078 (0.023)
Predation Pressure	Predator count: 0.309 ± 0.112 (0.006)

## Sheet: Supplementary Table 3
Supplementary Table 3 – Environment Prevalence – Results from a phylogenetic linear regression (phylolm) testing the effect of environmental predictors on the prevalence of same-sex sexual behaviour (SSB) across primates. The model includes five predictors: mean annual temperature, mean annual precipitation, mean cloud cover, resource availability, and predation pressure.
Predictor Variable	Lambda (λ)	Estimate ± SE (p-value)	Log likelihood	AIC
Intercept	<0.001	β0: 0.547 ± 0.178 (0.008)	-22.34	60.69
Temperature		Temperature: -0.439 ± 0.257 (0.107)
Precipitation		Precipitation: -0.137 ± 0.286 (0.639)
Cloud Cover		Cloud cover: 0.29 ± 0.334 (0.399)
Biomass		Biomass: 0.106 ± 0.281 (0.712)
Predation Pressure		Predator count: 0.217 ± 0.272 (0.437)

## Sheet: Supplementary Table 4
Supplementary Table 4 - Phylogenetic hurdle models - Phylogenetic hurdle models for SSB occurrence (hu; logit P(0)) and prevalence (mu; SSB>0). All models use the same predictors/scaling and phylogeny as the main analysis. The social only model collapses Hierarchy to a binary trait, and the overall model collapses all social traits to binary traits.
Model	Component	Predictor	Estimate	SE	l-95% CI	u-95% CI
Environment-only	Prevalence (mu, SSB > 0)	mean_temp_2019	-1.94	0.47	-2.84	-1.01
		mean_precip_2019	-0.49	0.43	-1.33	0.37
		mean_cloud_2019	0.14	0.3	-0.44	0.72
		mean_biomass_2019	-0.07	0.22	-0.5	0.36
		predator_count	-0.06	0.23	-0.51	0.41
	Occurrence (hu, logit P(0))	mean_temp_2019	0.2	0.24	-0.18	0.72
		mean_precip_2019	0.51	0.22	0.08	0.95
		mean_cloud_2019	0.27	0.19	-0.12	0.64
		mean_biomass_2019	0.1	0.14	-0.18	0.38
		predator_count	-0.27	0.15	-0.56	0.02
Life history-only	Prevalence (mu, SSB > 0)	sexual_dimorphism	0.25	0.34	-0.42	0.91
		median_body_mass	0.16	0.16	-0.16	0.47
		bodymass_range	-0.2	0.16	-0.51	0.13
		lifespan	0.44	0.28	-0.11	0.99
		adult_sex_ratio	-0.22	0.24	-0.7	0.25
	Occurrence (hu, logit P(0))	sexual_dimorphism	-0.37	0.19	-0.75	-0.01
		median_body_mass	-0.55	0.41	-1.4	0.19
		bodymass_range	-0.21	0.33	-0.87	0.44
		lifespan	-0.5	0.16	-0.82	-0.18
		adult_sex_ratio	0.01	0.16	-0.3	0.34
Social-only (collapsed)	Prevalence (mu, SSB > 0)	group_size_scaled	0.42	0.22	-0.03	0.86
		group_structureMonogamouspairs	-0.15	0.78	-1.67	1.36
		group_structureMultiMaleMultiFemale	-0.42	0.61	-1.6	0.78
		group_structureSingleMaleMultiFemale	-0.2	0.66	-1.51	1.07
		group_structureSolitary	-0.78	0.81	-2.34	0.78
		hierarchical_collapsedHigh	0.35	0.74	-1.11	1.79
	Occurrence (hu, logit P(0))	group_size_scaled	-0.37	0.14	-0.67	-0.1
		group_structureMonogamouspairs	0.59	0.58	-0.56	1.74
		group_structureMultiMaleMultiFemale	-0.14	0.46	-1.03	0.73
		group_structureSingleMaleMultiFemale	0.27	0.51	-0.74	1.27
		group_structureSolitary	1.07	0.58	-0.04	2.23
		hierarchical_collapsedHigh	-1.08	0.49	-2.09	-0.14
Overall combined (collapsed)	Prevalence (mu, SSB > 0)	mean_temp_2019	-0.2	0.53	-1.24	0.82
		mean_precip_2019	0.28	0.31	-0.31	0.89
		mean_cloud_2019	0.06	0.34	-0.74	0.6
		mean_biomass_2019	0.14	0.24	-0.32	0.6
		predator_count	-0.17	0.31	-0.78	0.44
		sexual_dimorphism	-0.63	0.31	-1.24	-0.01
		median_body_mass	-0.48	0.86	-2.16	1.2
		bodymass_range	-0.41	0.73	-1.83	1.05
		lifespan	0.24	0.28	-0.31	0.8
		adult_sex_ratio	-0.68	0.28	-1.22	-0.11
		group_size	0.12	0.35	-0.57	0.79
		group_structure_collapsedcomplex	0.28	0.71	-1.13	1.66
		hierarchy_collapsedhigh	0.35	0.62	-0.88	1.58
		mating_system_collapsednonMonogamous	0.16	0.8	-1.42	1.72
		infant_rearing_collapsedotherMparent	0.42	0.55	-0.63	1.5
	Occurrence (hu, logit P(0))	mean_temp_2019	-0.06	0.42	-0.85	0.75
		mean_precip_2019	-0.26	0.21	-0.66	0.16
		mean_cloud_2019	0.18	0.23	-0.28	0.62
		mean_biomass_2019	-0.06	0.18	-0.4	0.28
		predator_count	-0.2	0.16	-0.52	0.12
		sexual_dimorphism	0.29	0.18	-0.07	0.65
		median_body_mass	0.04	0.64	-1.15	1.23
		bodymass_range	0.31	0.54	-0.69	1.4
		lifespan	-0.57	0.18	-0.92	-0.22
		adult_sex_ratio	0.22	0.17	-0.12	0.54
		group_size	-0.28	0.19	-0.63	-0.1
		group_structure_collapsedcomplex	-1.49	0.4	-2.31	-0.74
		hierarchy_collapsedhigh	-0.46	0.42	-1.3	0.36
		mating_system_collapsednonMonogamous	-0.64	0.51	-1.69	0.33
		infant_rearing_collapsedotherMparent	0.07	0.37	-0.66	0.79

## Sheet: Supplementary Table 5
Supplementary Table 5 – Life History Occurrence – Results from a phylogenetic logistic regression (phyloglm) testing the effect of life history traits on the occurrence of same-sex sexual behaviour (SSB) across primates. The model includes five predictors: sexual dimorphism, median adult body mass, body mass range, lifespan, and adult sex ratio.
Predictor Variable	Estimate ± SE (p-value)	Log likelihood	AIC	Alpha
Intercept	β0: -1.207 ± 0.59 (0.041)	-157.9	329.9	1.691
Sexual Size Dimorphism	Sexual dimorphism: 0.912 ± 0.304 (0.003)
Median Body Size	Median size: 0.331 ± 0.383 (0.387)
Body Size Range	Size range: 0.042 ± 0.259 (0.871)
Lifespan	Lifespan: 0.396 ± 0.11 (<0.001)
Sex Ratio	Adult sex ratio: 0.096 ± 0.073 (0.192)

## Sheet: Supplementary Table 6
Supplementary Tabel 6 – Life History Prevalence – Results from a phylogenetic linear regression (phylolm) testing the effect of life history traits on the prevalence of same-sex sexual behaviour (SSB) across primates. The model includes five predictors: sexual dimorphism, median adult body mass, body mass range, lifespan, and adult sex ratio.
Predictor Variable	Lambda (λ)	Estimate ± SE (p-value)	Log likelihood	AIC
Intercept	<0.001	β0: 0.552 ± 0.191 (0.011)	-23.28	62.57
Sexual Dimorphism		Sexual dimorphism: 0.17 ± 0.183 (0.366)
Median Body Size		Median size: -0.13 ± 0.323 (0.693)
Body Size Range		Size range: -0.12 ± 0.309 (0.703)
Lifespan		Lifespan: 0.024 ± 0.243 (0.923)
Sex Ratio		Species sex ratio: -0.056 ± 0.225 (0.806)

## Sheet: Supplementary Table 7
Supplementary Table 7 – Simplified Social Occurrence – Results from a simplified phylogenetic logistic regression (phyloglm) testing the effect of key social system traits on the occurrence of same-sex sexual behaviour (SSB) across primates. The model includes three predictors: median group size, group structure, and hierarchical structure (collapsed).
Predictor Variable	Estimate ± SE (p-value)	Log likelihood	AIC	Alpha	Notes
Intercept	β0: -1.265 ± 0.721 (0.079)	-138.7	293.4	3.207	Baseline (fission-fusion, low stratification)
Group Size	Group size: 0.215 ± 0.13 (0.098)
Group Structure	Pair-living: -0.834 ± 0.604 (0.167)
	Multi-male-multi-female: -0.484 ± 0.518 (0.35)
	Single-male-multi-female: -0.771 ± 0.606 (0.203)
	Solitary: -1.703 ± 0.826 (0.039)
Hierarchy	High stratification: 1.416 ± 0.392 (<0.001)

## Sheet: Supplementary Table 8
Supplementary Table 8 – Social Prevalence – Phylogenetic linear regression (phylolm) testing the effect of key social system traits on the prevalence of same-sex sexual behaviour (SSB) across primates. The model included three predictors: median group size (continuous), group structure, and hierarchical structure (collapsed). The model failed to converge due to limited sample size and low varianc…
Predictor Variable	Lambda (λ)	Estimate ± SE (p-value)	Log likelihood	AIC	Notes
Intercept	NA	β0: NA	NA	NA	Baseline (fisson-fusion, dominant pair, monogamous, allo-parental care)
Group Size	NA	Group size: NA
Group Structure	NA	Pair-living: NA
	NA	Multi-male-multi-female: NA
	NA	Single-male-multi-female: NA
Hierarchical Structure	NA	Egalitarian: NA
	NA	Matriarchal: NA
	NA	Patriarchal: NA
Mating System	NA	Polygynandrous: NA
	NA	Polygynous: NA
Infant Rearing Strategy	NA	Maternal care: NA
NOTE: This model failed to converge, likely due to limited sample size (n = 23) and low variation across predictors. As a result, predictors are not reported.

## Sheet: Supplementary Table 9
Supplementary Table 9 - Phylogenetic regression models of SSB prevalence filtered for ethogram completeness - Environment and life history models were fitted using phylolm (Gaussian, Pagel’s λ), but the social and full predictor models failed to converge due to singular social predictors.
Model	Predictor Variable	Estimate ± SE (p-value)	Log likelihood	AIC	Alpha	Notes
Environment	(Intercept)	0.752 ± 0.102 (p = 0.002)	1.866	12.267	0.05	Pagel's λ (ML) < 0.001
	mean_temp_2019	0.219 ± 0.212 (p = 0.360)	1.866	12.267	0.05	Pagel's λ (ML) < 0.001
	mean_precip_2019	-0.326 ± 0.122 (p = 0.055)	1.866	12.267	0.05	Pagel's λ (ML) < 0.001
	mean_cloud_2019	-0.722 ± 0.169 (p = 0.013)	1.866	12.267	0.05	Pagel's λ (ML) < 0.001
	mean_biomass_2019	-0.032 ± 0.143 (p = 0.832)	1.866	12.267	0.05	Pagel's λ (ML) < 0.001
	predator_count	-0.819 ± 0.191 (p = 0.013)	1.866	12.267	0.05	Pagel's λ (ML) < 0.001
Life history	(Intercept)	0.675 ± 0.878 (p = 0.485)	-9.948	35.896	0.05	Pagel's λ (ML) < 0.001
	sexual_dimorphism	0.322 ± 1.154 (p = 0.794)	-9.948	35.896	0.05	Pagel's λ (ML) < 0.001
	median_body_mass	2.211 ± 3.133 (p = 0.519)	-9.948	35.896	0.05	Pagel's λ (ML) < 0.001
	bodymass_range	-2.494 ± 3.493 (p = 0.514)	-9.948	35.896	0.05	Pagel's λ (ML) < 0.001
	lifespan	-0.301 ± 1.385 (p = 0.839)	-9.948	35.896	0.05	Pagel's λ (ML) < 0.001
	adult_sex_ratio	-0.395 ± 0.596 (p = 0.543)	-9.948	35.896	0.05	Pagel's λ (ML) < 0.001
Social	NA	NA	NA	NA	0.05	Failed due to near-singularity of social predictors
Full	NA	NA	NA	NA	0.05	Failed due to exact singularity of social predictors

## Sheet: Supplementary Table 10
Supplementary Table 10 – Phylogenetic regression models run by primate group – Phylogenetic regression models for SSB occurrence and i) environment, ii) life history, and iii) social rerun based on primate clades – Cercopithecidae (formerly Old World monkeys), Platyrrhini (formerly New World monkeys), Apes (Hominoidae and Hylobatidae), and Strespirrhini. Tarsiiformes did not have any recorded SSB…
Primate Group	Model	Predictor Variable	Estimate ± SE (p-value)	Log likelihood	AIC	Alpha	Notes
Cercopithecidae	Environment	Intercept	β0: -0.964 ± 0.413 (0.02)	-69.14	152.27	10.781
		Temperature	Temperature: 0.211 ± 0.232 (0.363)
		Precipitation	Precipitation: -0.714 ± 0.288 (0.013)
		Cloud Cover	Cloud cover: 0.073 ± 0.252 (0.772)
		Biomass	Biomass: -0.365 ± 0.205 (0.075)
		Predation Pressure	Predator count: 0.042 ± 0.199 (0.833)
	Life History	Intercept	β0: -16.217 ± 1503.429 (0.991)	-80.99	175.98	38.017
		Sexual Size Dimorphism	Sexual dimorphism: 15.262 ± 1503.429 (0.992)
		Median Body Size	Median size: 0.284 ± 0.245 (0.247)
		Body Size Range	Size range: 0.241 ± 0.238 (0.311)
		Lifespan	Lifespan: -0.369 ± 0.193 (0.056)
		Adult Sex Ratio	Adult sex ratio: 0.093 ± 0.160 (0.562)
	Social	Intercept	β0: NA ± NA (NA)	NA	NA	NA	Model failed due to limited variation in predictor categories
		Group Size	Group size: NA ± NA (NA)
		Group Structure	Pair-living: NA ± NA (NA)
			Multi-male-multi-female: NA ± NA (NA)
			Single-male-multi-female: NA ± NA (NA)
			Solitary: NA ± NA (NA)
		Hierarchical Structure	Low stratification: NA ± NA (NA)
Platyrrhini	Environment	Intercept	β0: -0.775 ± 0.672 (0.249)	-62.82	139.64	5.965
		Temperature	Temperature: 0.050 ± 0.077 (0.515)
		Precipitation	Precipitation: -0.128 ± 0.193 (0.505)
		Cloud Cover	Cloud cover: -0.176 ± 0.212 (0.407)
		Biomass	Biomass: -0.203 ± 0.139 (0.143)
		Predation Pressure	Predator count: 0.107 ± 0.125 (0.395)
	Life History	Intercept	β0: -2.127 ± 1.096 (0.0.052)	-62.32	138.64	1.535
		Sexual Size Dimorphism	Sexual dimorphism: 0.652 ± 0.578 (0.260)
		Median Body Size	Median size: 0.198 ± 0.312 (0.526)
		Body Size Range	Size range: 0.200 ± 0.219 (0.361)
		Lifespan	Lifespan: 0.722 ± 0.283 (0.011)
		Adult Sex Ratio	Adult sex ratio: -0.010 ± 0.178 (0.955)
	Social	Intercept	β0: -1.068 ± 1.059 (0.313)	-59.84	133.68	3.116	Baseline (fission-fusion, low stratification)
		Group Size	Group size: 0.138 ± 0.164 (0.400)
		Group Structure	Pair-living: 0.093 ± 0.616 (0.880)
			Multi-male-multi-female: 0.096 ± 0.550 (0.861)
			Single-male-multi-female: -15.352 ± 1146.777 (0.989)
		Hierarchical Structure	High stratification: 0.777 ± 0.391 (0.047)
Apes (Hominoidae and Hylobatidae)	Environment	Intercept	β0: -0.380 ± 1.318 (0.773)	-9.214	32.429	6.059
		Temperature	Temperature: 0.533 ± 0.411 (0.194)
		Precipitation	Precipitation: -0.623 ± 0.501 (0.214)
		Cloud Cover	Cloud cover: 1.059 ± 0.683 (0.121)
		Biomass	Biomass: -0.263 ± 0.257 (0.306)
		Predation Pressure	Predator count: 0.483 ± 0.434 (0.265)
	Life History	Intercept	β0: -0.501 ± 1.349 (0.710)	-10.182	34.364	21.457
		Sexual Size Dimorphism	Sexual dimorphism: -0.199 ± 3.062 (0.948)
		Median Body Size	Median size: -0.147 ± 1.744 (0.0.933)
		Body Size Range	Size range: -0.090 ± 1.034 (0.930)
		Lifespan	Lifespan: 0.303 ± 0.425 (0.475)
		Adult Sex Ratio	Adult sex ratio: -0.126 ± 2.000 (0.950)
	Social	Intercept	β0: NA ± NA (NA)	NA	NA	NA	Model failed due to limited variation in predictor categories
		Group Size	Group size: NA ± NA (NA)
		Group Structure	Pair-living: NA ± NA (NA)
			Multi-male-multi-female: NA ± NA (NA)
			Single-male-multi-female: NA ± NA (NA)
			Solitary: NA ± NA (NA)
		Hierarchical Structure	Low stratification: NA ± NA (NA)
Strespirrhini	Environment	Intercept	β0: -10.688 ± 8.846 (0.227)	-6.568	27.136	3.59
		Temperature	Temperature: 3.395 ± 3.299 (0.303)
		Precipitation	Precipitation: -6.861 ± 6.721 (0.307)
		Cloud Cover	Cloud cover: 4.779 ± 4.563 (0.295)
		Biomass	Biomass: -3.074 ± 2.717 (0.258)
		Predation Pressure	Predator count: 1.260 ± 1.042 (0.227)
	Life History	Intercept	β0: -12.015 ± 7.049 (0.0.088)	-4.809	23.619	3.312
		Sexual Size Dimorphism	Sexual dimorphism: 7.882 ± 5.366 (0.142)
		Median Body Size	Median size: 1.176 ± 0.882 (0.183)
		Body Size Range	Size range: -2.960 ± 1.872 (0.114)
		Lifespan	Lifespan: 3.700 ± 2.205 (0.093)
		Adult Sex Ratio	Adult sex ratio: 0.210 ± 0.566 (0.710)
	Social	Intercept	β0: -6.474 ± 19.454 (0.739)	-10.03	36.06	0.159	Baseline (fission-fusion, low stratification)
		Group Size	Group size: -0.069 ± 0.266 (0.796)
		Group Structure	Pair-living: -7.861 ± 176.397 (0.965)
			Multi-male-multi-female: -6.986 ± 176.398 (0.968)
			Single-male-multi-female: -9.094 ± 176.452 (0.959)
			Solitary: -7.718 ± 176.397 (0.965)
		Hierarchical Structure	High stratification: 12.297 ± 175.341 (0.944)

[truncated: 19 more sheets: Supplementary Table 11, Supplementary Table 12, Supplementary Table 13, Supplementary Table 14, Supplementary Table 15, Supplementary Table 16, Supplementary Table 17, Supplementary Table 18, Supplementary Table 19, Supplementary Table 20, Supplementary Table 21, Supplementary Table 22 , Supplementary Table 23, Supplementary Table 24, Supplementary Table 25, Supplementary Table 26, Supplementary Table 27, Supplementary Table 28, Supplementary Table 29]
